# Supplementary material for: Heterozygous knockout of Bile salt export pump ameliorates liver steatosis in mice fed a high-fat diet
Source: PubMed Central journal article supplement (PMC7423142; doi:10.1371/journal.pone.0234750), 2020-08-12

**A**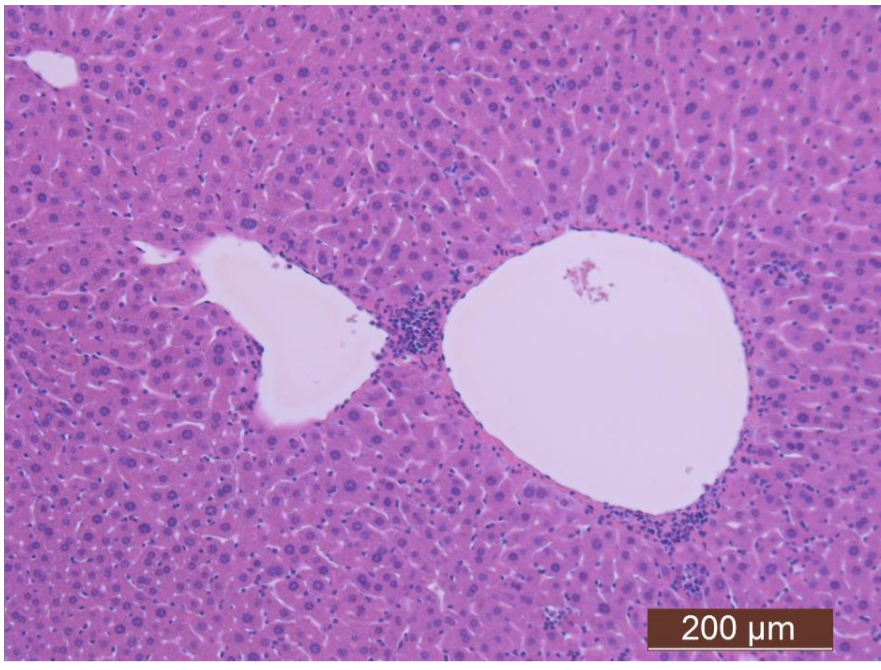**B**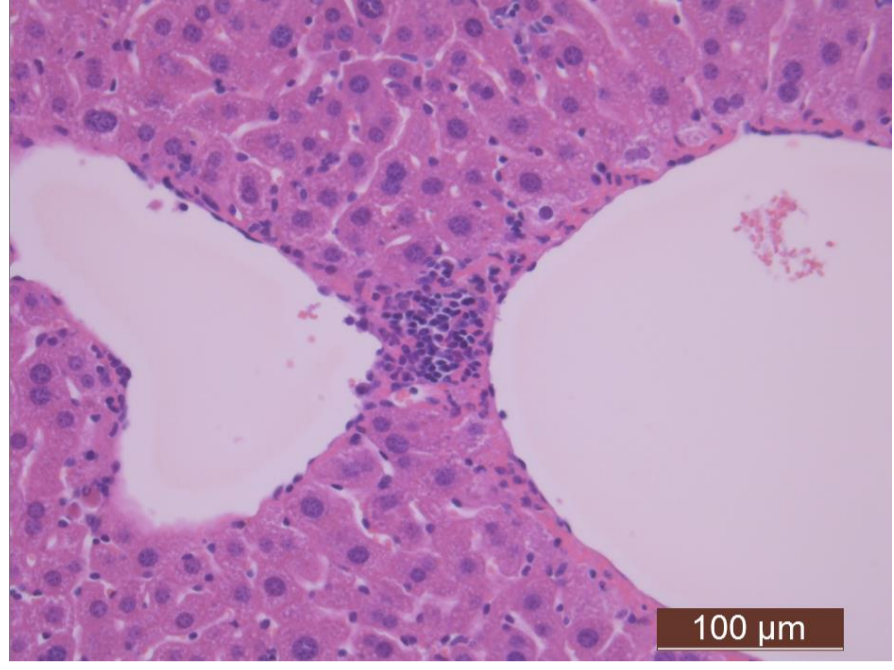**C**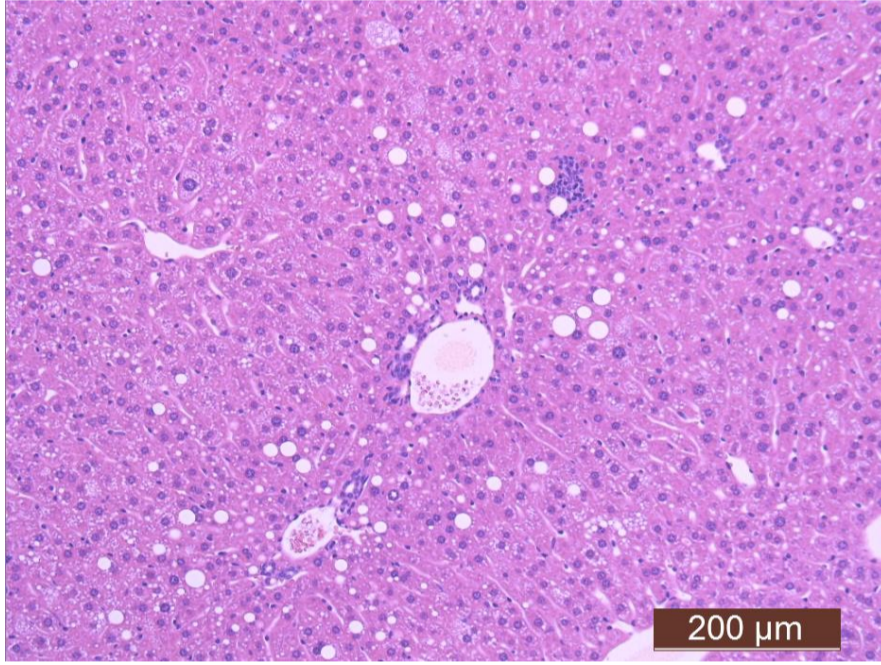**D**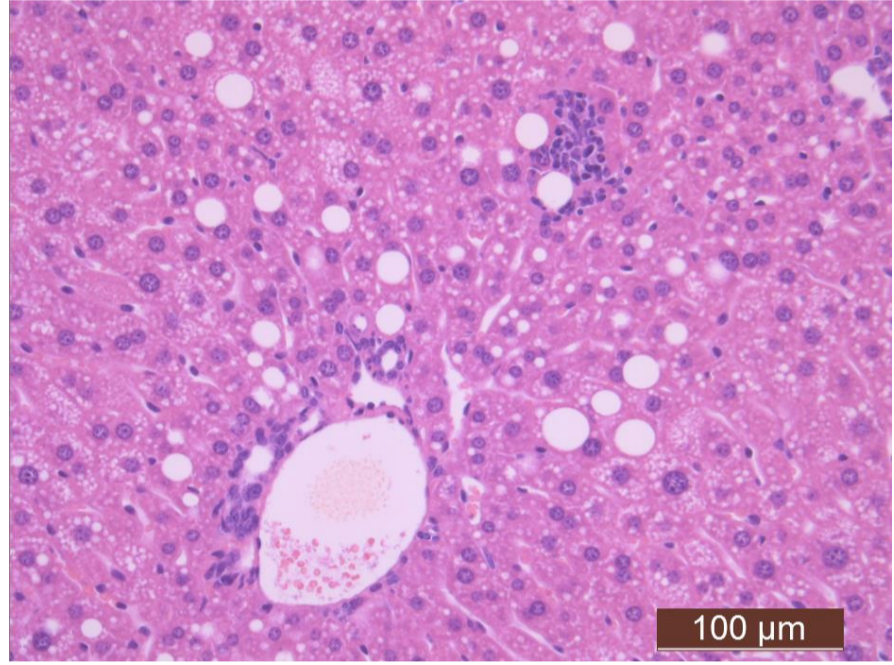**E**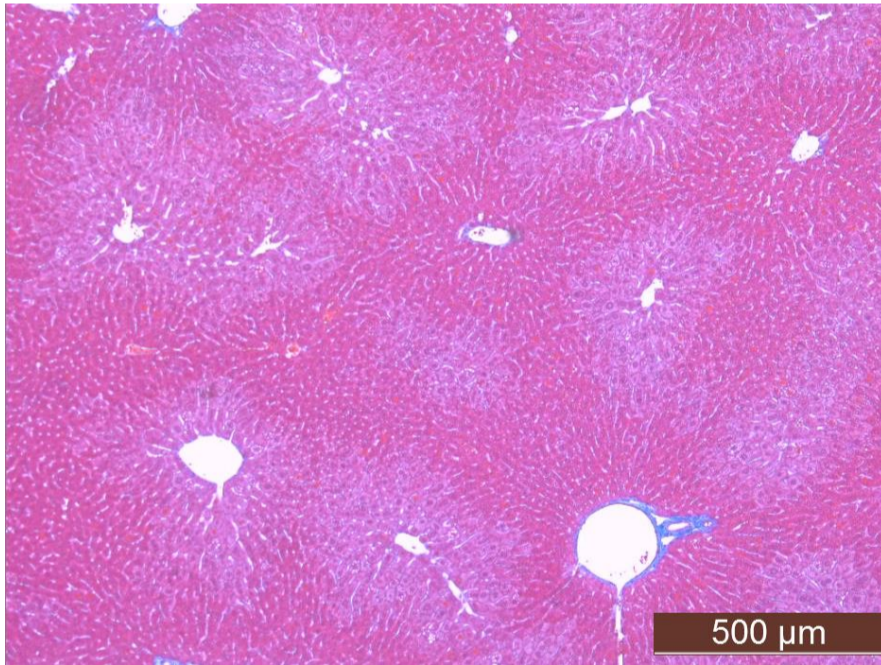**F**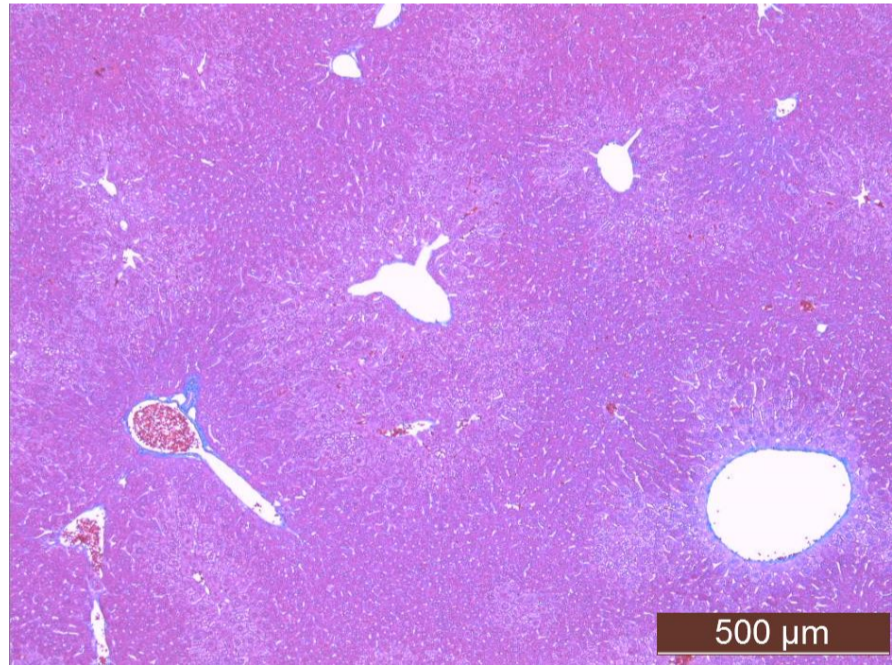**G**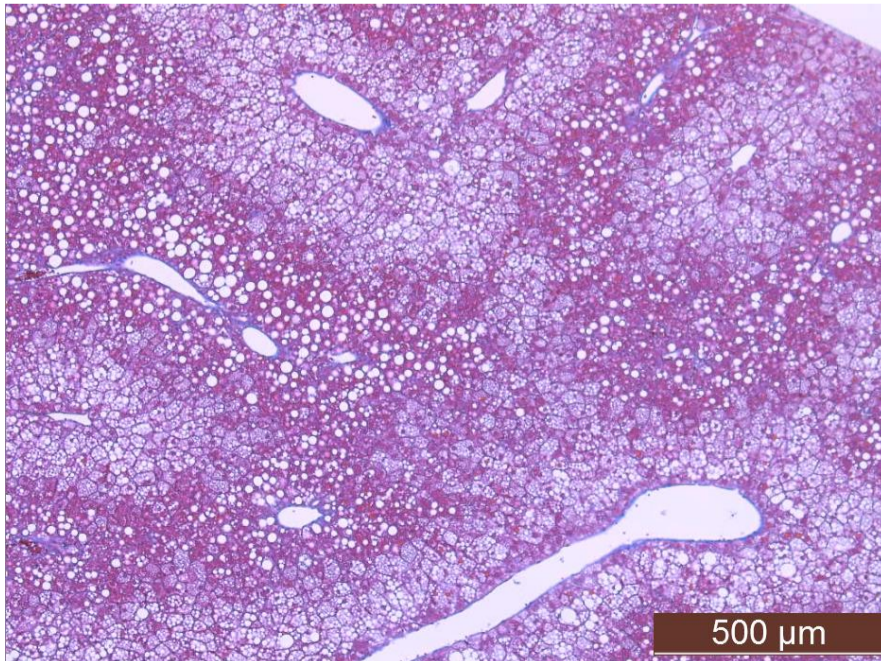**H**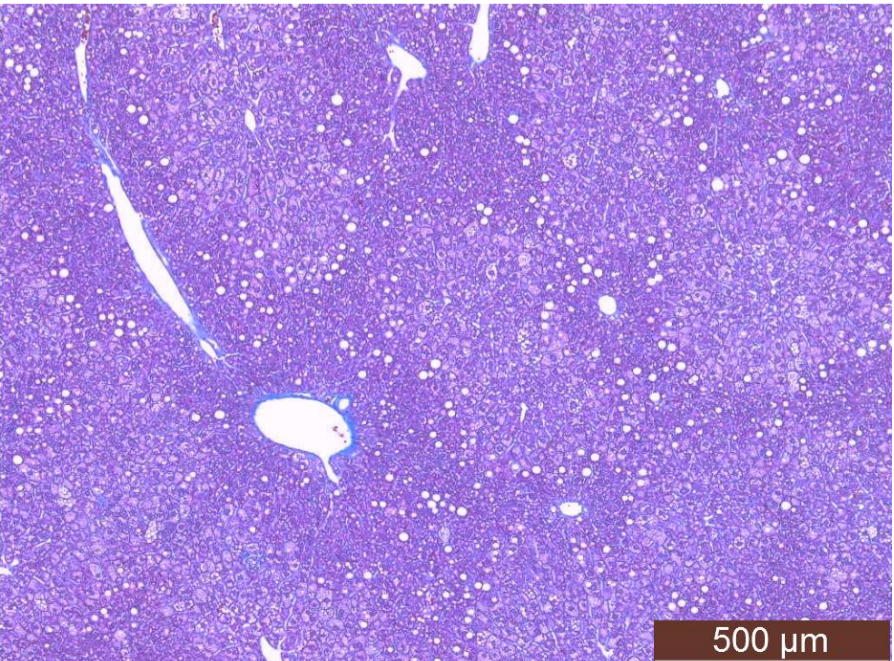

Supplement: pone.0234750.s002.pdf [file pone.0234750.s002.pdf]
