# Supplementary material for: Heterozygous knockout of Bile salt export pump ameliorates liver steatosis in mice fed a high-fat diet
Source: PubMed Central journal article supplement (PMC7423142; doi:10.1371/journal.pone.0234750), 2020-08-12

A

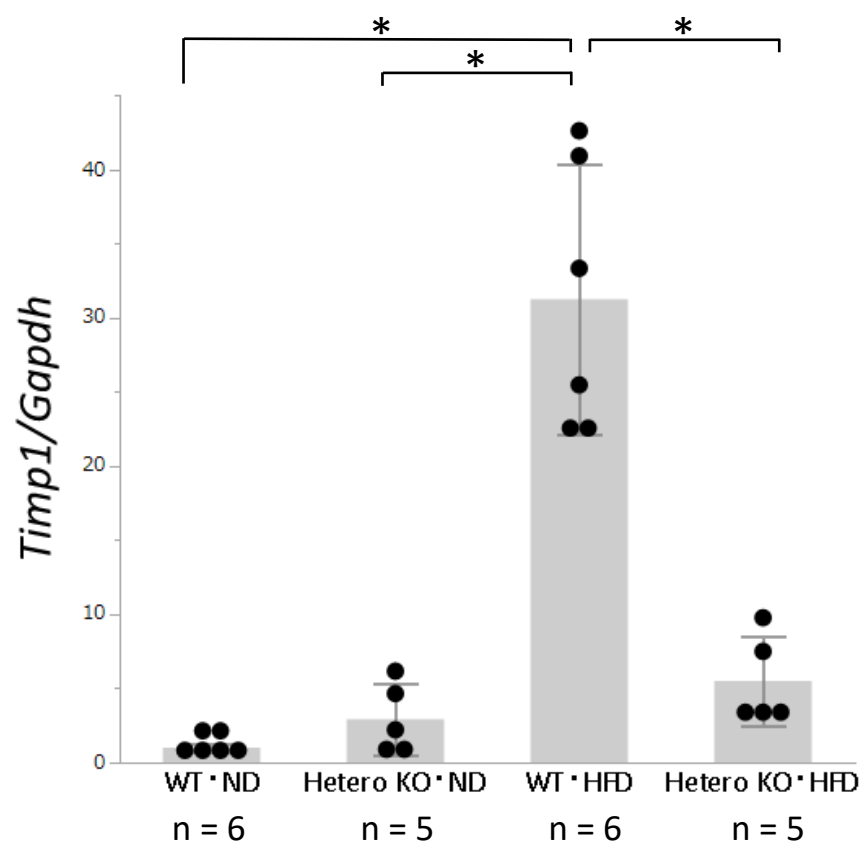

B

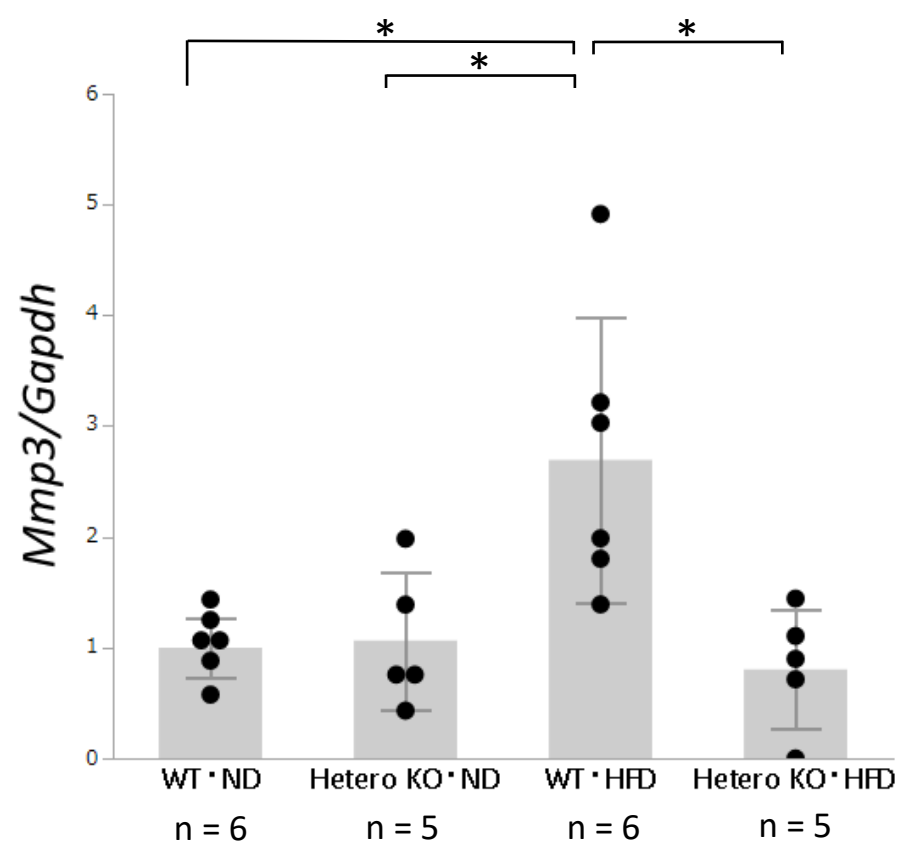

C

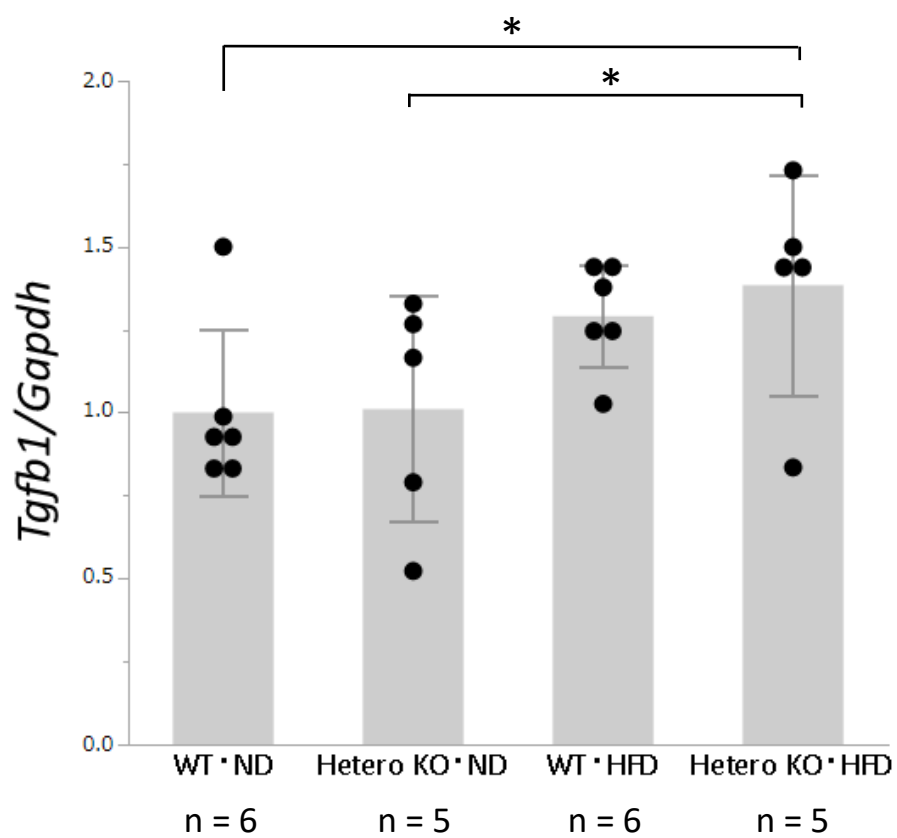

Supplement: pone.0234750.s003.pdf [file pone.0234750.s003.pdf]
