# Supplementary material for: Heterozygous knockout of Bile salt export pump ameliorates liver steatosis in mice fed a high-fat diet
Source: PLoS One. 2020 Aug 12;15(8):e0234750. doi: 10.1371/journal.pone.0234750 (PMC7423142; doi:10.1371/journal.pone.0234750)
Supplement: S1 Table — (XLSX) [file pone.0234750.s005.xlsx]

## Sheet: Sheet1
gene	Unigene ID	Primer and Probe
Bsep	Mm.439855	Mm00445168_m1
Mrp2	Mm.39054	Mm00496899_m1
Ntcp	Mm.486361	Mm00441421_m1
Fxr	Mm.3095	Mm00436425_m1
Cyp7a1	Mm.57029	Mm00484150_m1
Hmgcr	Mm.316652	Mm01282499_m1
Ldlr	Mm.3213	Mm01177349_m1
Abcg5	Mm.289590	Mm00446241_m1
Srebf2	Mm.38016	Mm01306292_m1
Col1a1	Mm.277735	Mm00801666_g1
Col1a2	Mm.277792	Mm00483888_m1
Timp1	Mm.8245	Mm01341361_m1
Mmp3	Mm.4993	Mm00440295_m1
Tgfb1	Mm.248380	Mm01178820_m1
I-babp	Mm.142716	Mm00434315_m1
Tgr5	Mm.246587	Mm.04212121_s1
Npc1l1	Mm.212492	Mm01191973_m1
